# Supplementary material for: Eu2+ and Mn2+ co-doped Lu2Mg2Al2Si2O12 phosphors for high sensitivity and multi-mode optical pressure sensing
Source: Royal Society of Chemistry journal article supplement (doi:10.1039/d3qi00198a), 2023-01-01
Supplement: d3qi00198a1.pdf [file d3qi00198a1.pdf]

## Supporting Information

### **Eu<sup>2+</sup> and Mn<sup>2+</sup> Co-doping Lu<sub>2</sub>Mg<sub>2</sub>Al<sub>2</sub>Si<sub>2</sub>O<sub>12</sub> Phosphor for High Sensitivity and Multi-mode Optical Pressure Sensing**

Zhibo Zheng<sup>a</sup>, Yanhua Song<sup>a</sup>, Baofeng Zheng<sup>a</sup>, Yanxia Zhao<sup>a</sup>, Qilin Wang<sup>b</sup>, Xiangting Zhang<sup>c</sup>, Bo Zou<sup>d\*</sup> and Haifeng Zou<sup>a\*</sup>

<sup>a</sup> Department of Chemical Engineering and Applied Chemistry, College of Chemistry, Jilin University, Qianjin Street 2699, Changchun 130012, PR China.

<sup>b</sup> Engineering Research Center of Special Engineering Plastics, Ministry of Education, National and Local Joint Engineering Laboratory for Synthetic Technology of High Performance Polymer, College of Chemistry, Jilin University, Qianjin Street 2699, Changchun 130012, PR China.

<sup>c</sup> School of Materials Science and Engineering, Henan Normal University, Xinxiang 453007, PR China.

<sup>d</sup> State Key Laboratory of Superhard Materials, College of Physics, Jilin University, Qianjin Street 2699, Changchun 130012, PR China.

#### **Corresponding Author:**

\*E-mail: zoubo@jlu.edu.cn

\*E-mail: haifengzou0431@sohu.com.

**Table S1.** The specific parameters and reliability factors of single-doped sample and co-doped sample.

| Samples      | Crystallographic parameters |                       |                               | Reliability factors |          |          |
|--------------|-----------------------------|-----------------------|-------------------------------|---------------------|----------|----------|
|              | $a, b, c$ (Å)               | $V$ (Å <sup>3</sup> ) | $\alpha, \beta, \gamma$ (deg) | $R_p$               | $R_{wp}$ | $\chi^2$ |
| Single-doped | 11.872(5)                   | 1673.51(6)            | 90                            | 2.58%               | 3.43%    | 1.866    |
| Co-doped     | 11.875(4)                   | 1674.74(2)            | 90                            | 2.65%               | 3.57%    | 2.031    |

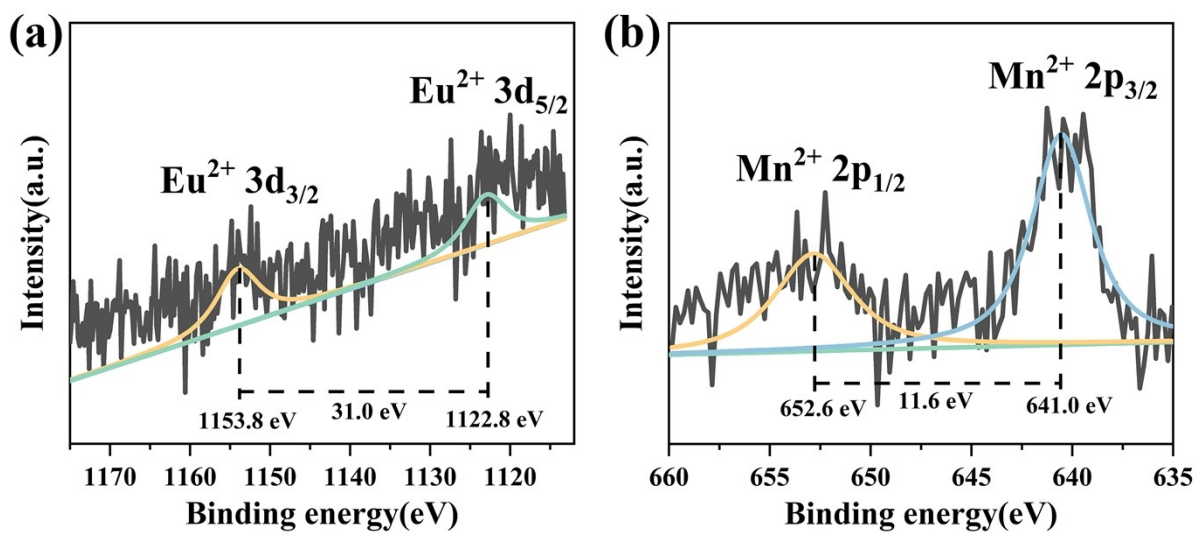

**Figure S1.** The high-resolution XPS spectra of (a) Eu<sup>2+</sup> and (b) Mn<sup>2+</sup>.

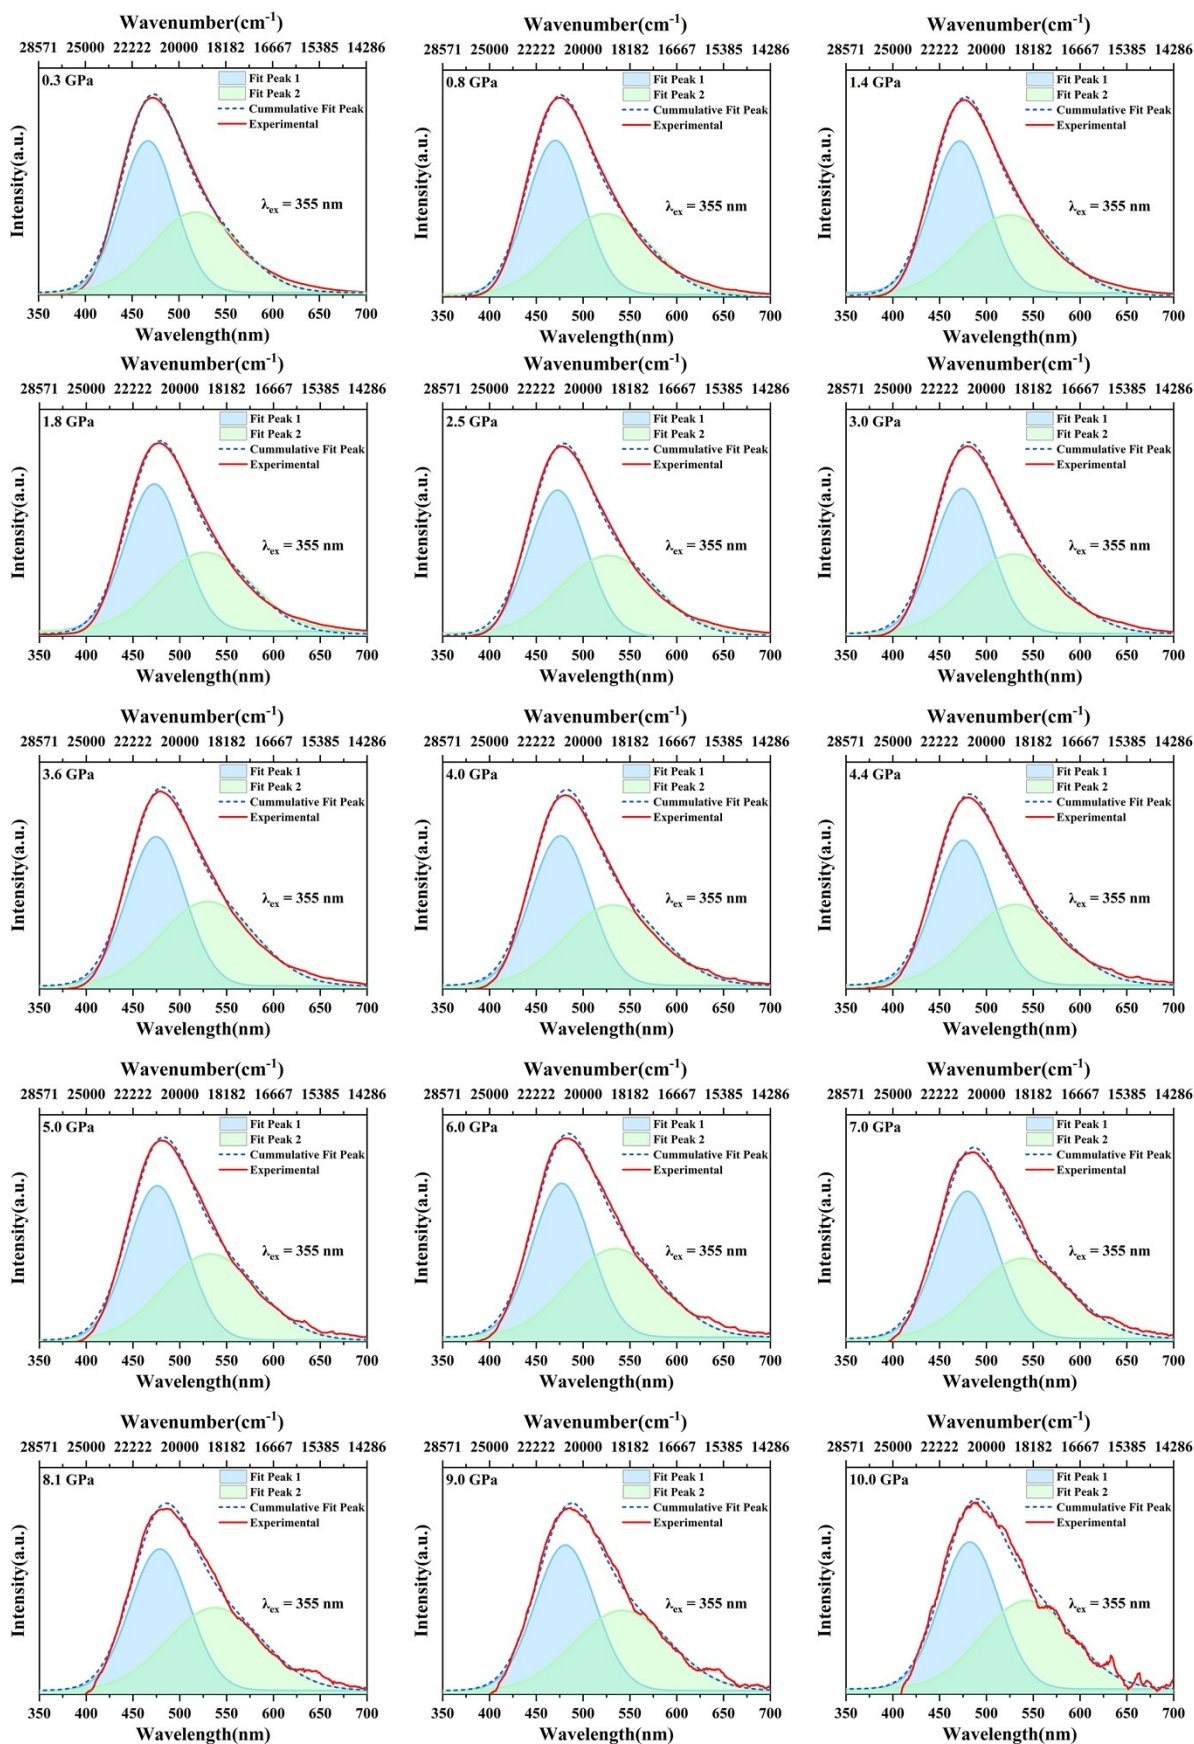

Figure S2. Gaussian fitting of the emission spectra of  $\text{Eu}^{2+}$  under different pressures.

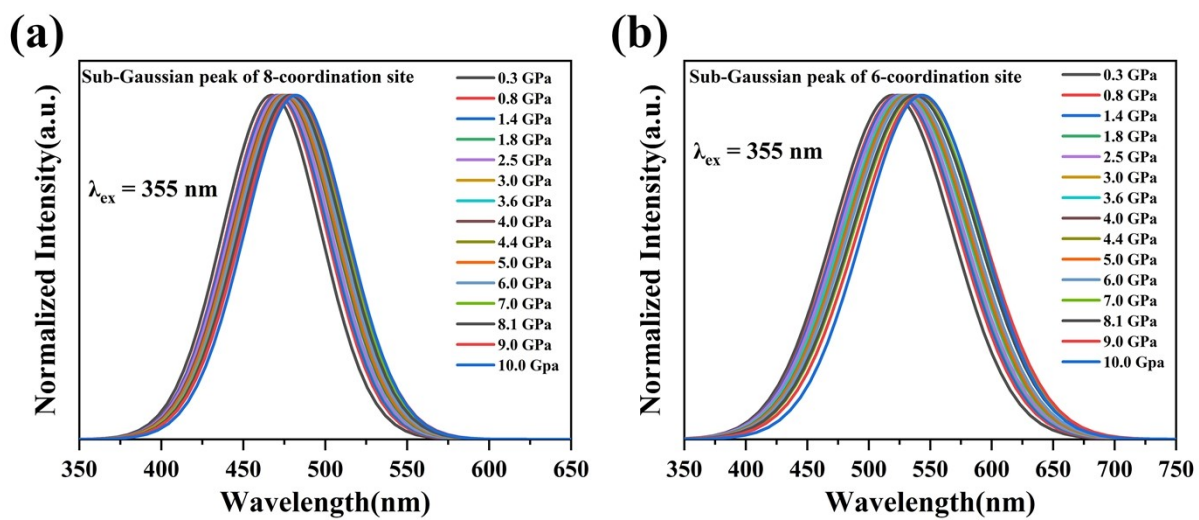

**Figure S3.** Normalized PL spectra of the (a) 8-coordination and (b) 6-coordination sites.

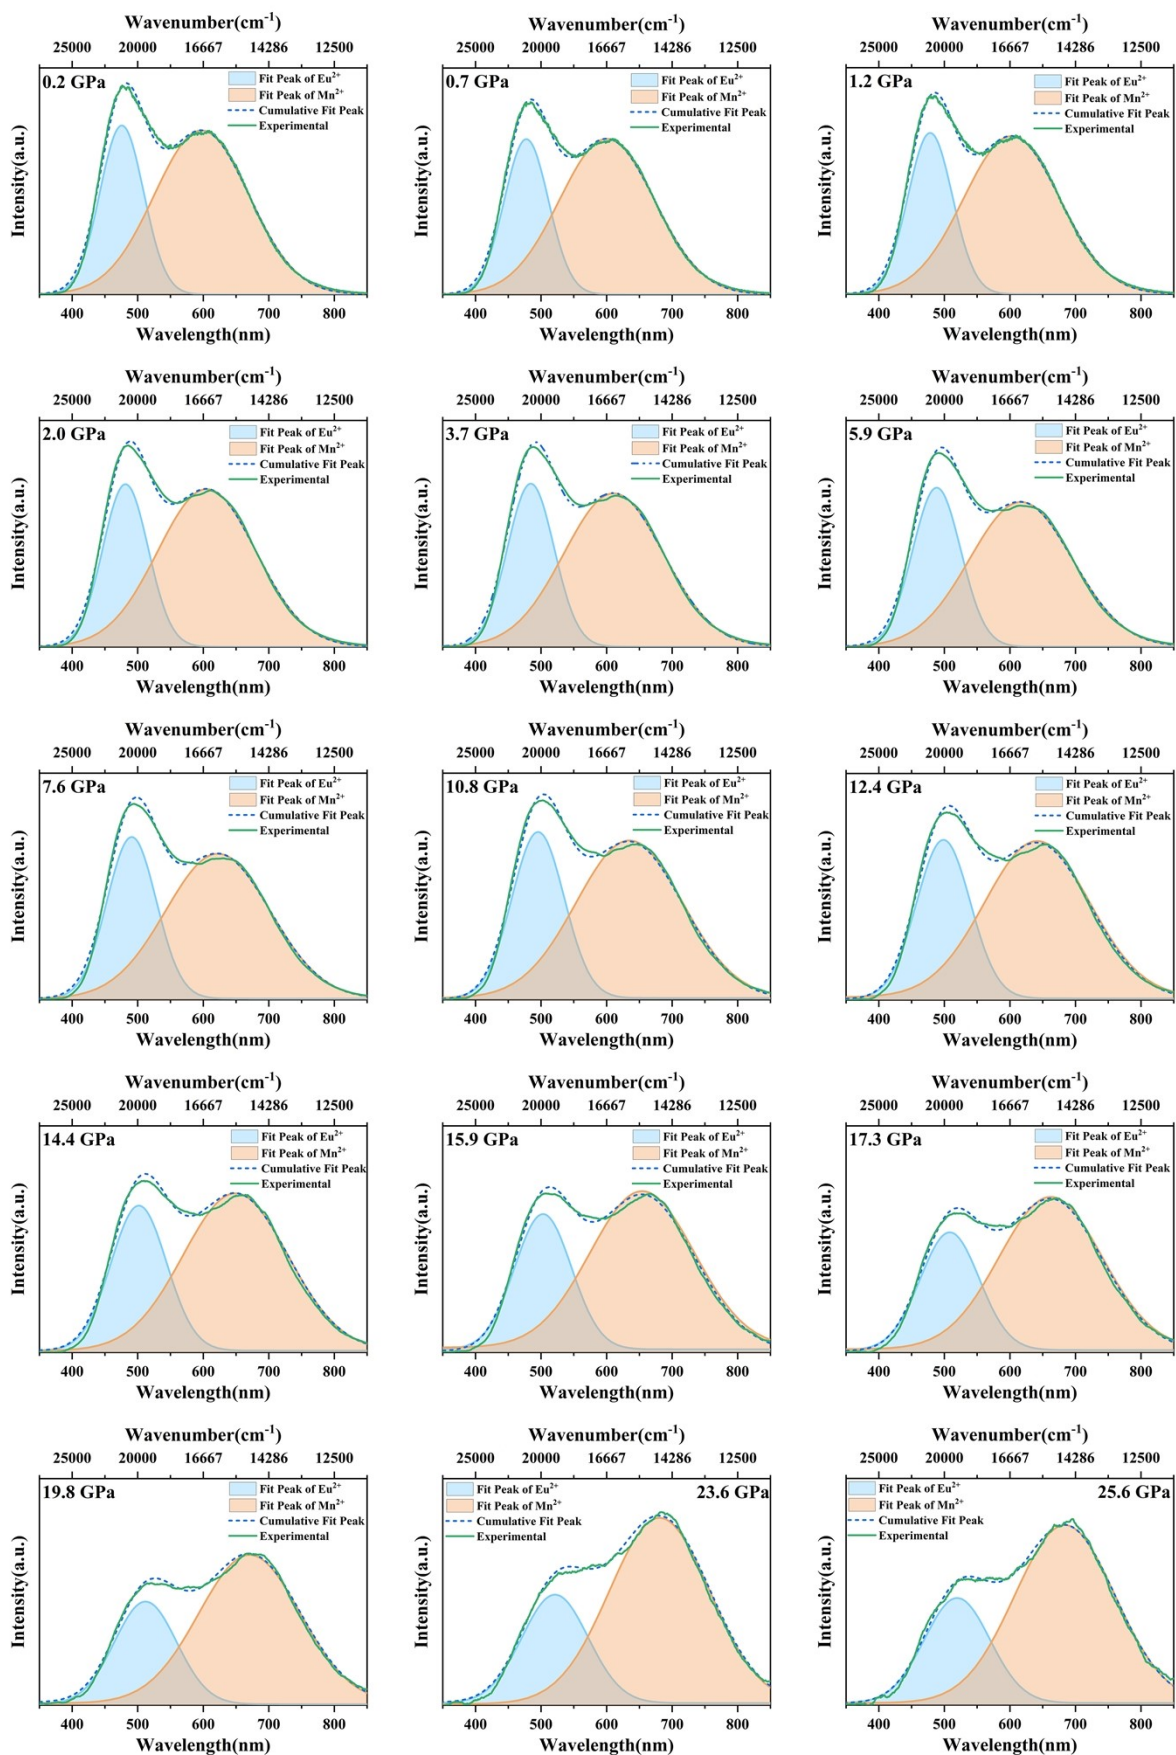

**Figure S4.** Gaussian fitting of the emission spectra of  $\text{Eu}^{2+}$ ,  $\text{Mn}^{2+}$  under different pressures.

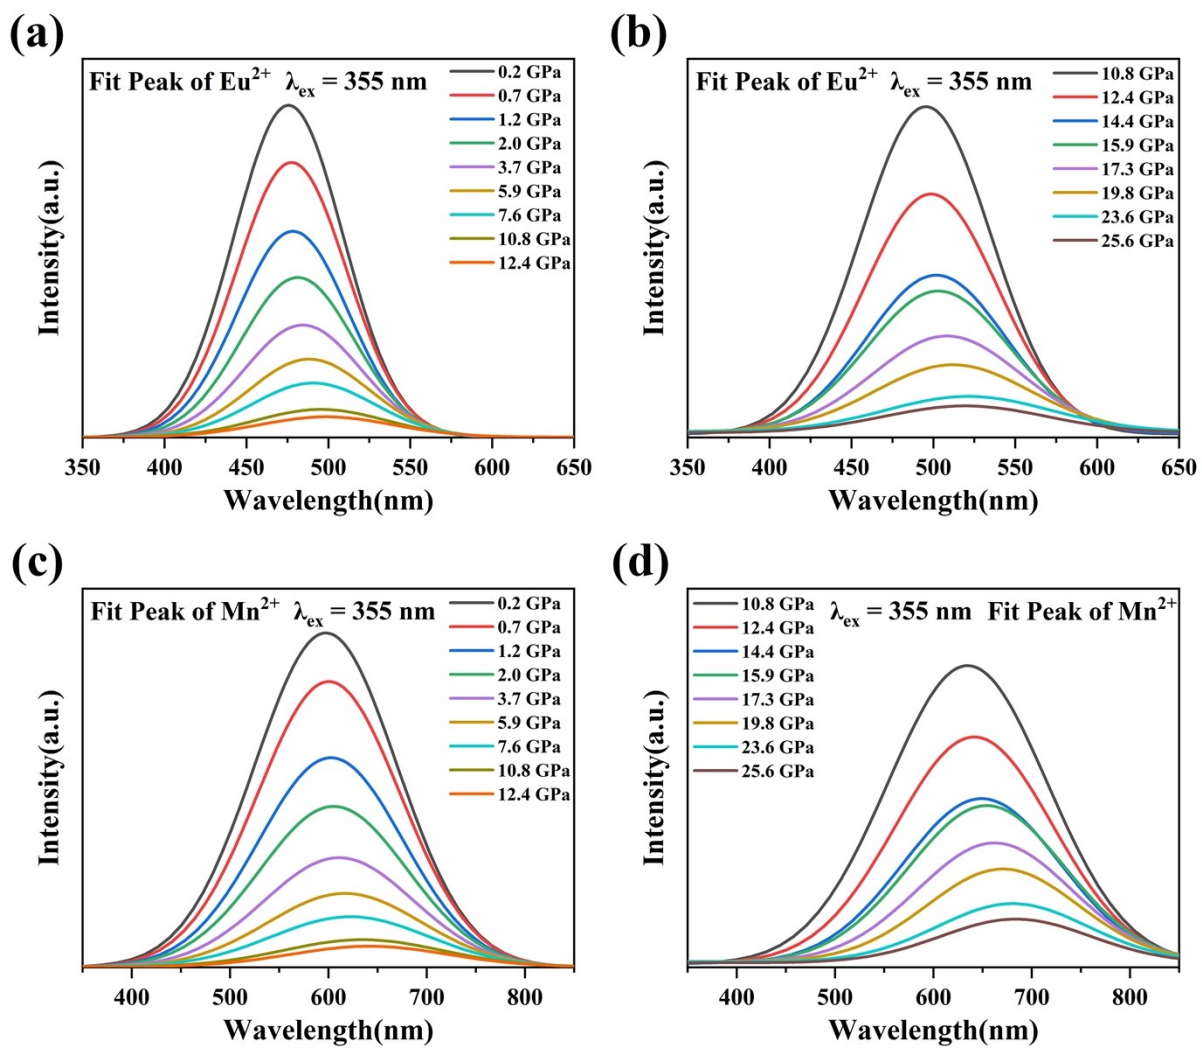

Figure S5. (a), (b) The fitting PL spectra of the  $\text{Eu}^{2+}$  and (c), (d) fitting PL spectra of the  $\text{Mn}^{2+}$ .

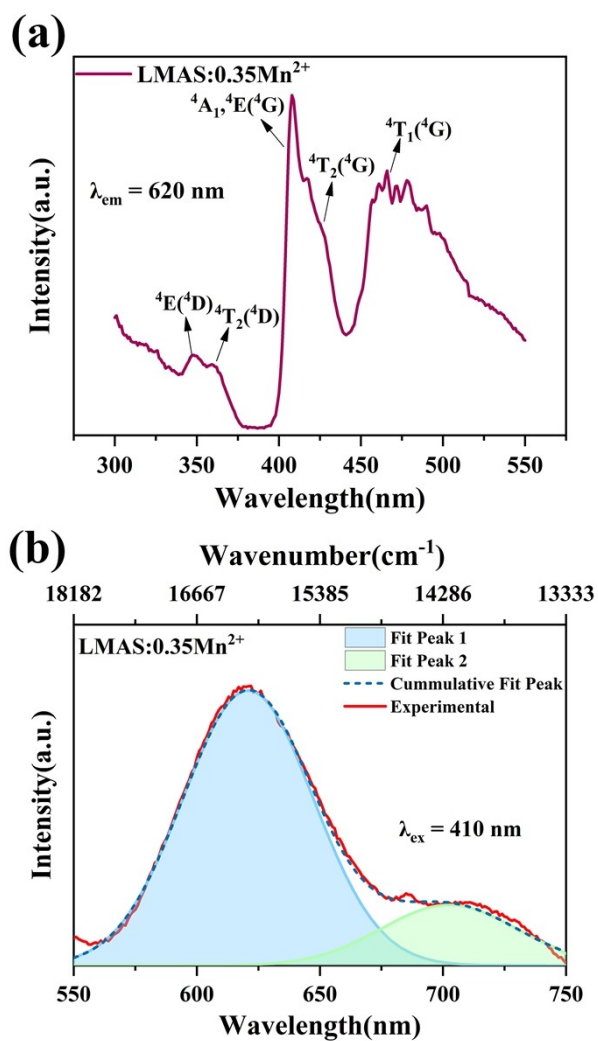

Figure S6. (a) PLE and (b) PL spectra of LMAS:0.35Mn<sup>2+</sup>.

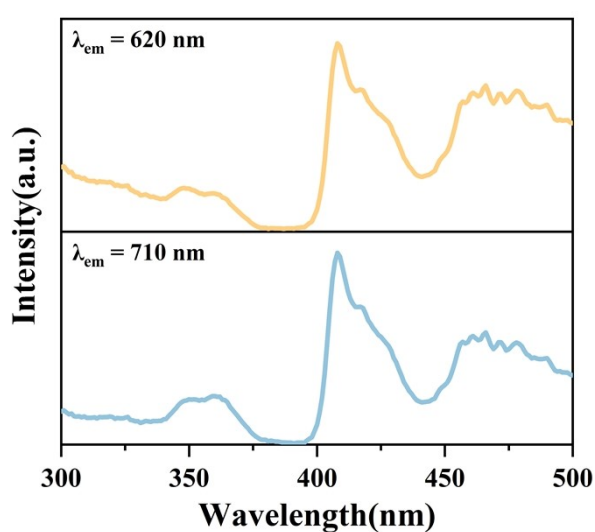

Figure S7. The PLE spectra of LMAS:0.35Mn<sup>2+</sup> under 710 nm and 620 nm.

**Table S2.** Excitation spectrum data of LMAS:0.35Mn<sup>2+</sup>.

| Energy level ( <sup>6</sup> A <sub>1</sub> ( <sup>6</sup> S) → ) | Wavelength (nm) | Energy (cm <sup>-1</sup> ) |
|------------------------------------------------------------------|-----------------|----------------------------|
| <sup>4</sup> E( <sup>4</sup> D)                                  | 348             | 28736                      |
| <sup>4</sup> T <sub>2</sub> ( <sup>4</sup> D)                    | 360             | 27778                      |
| <sup>4</sup> A <sub>1</sub> , <sup>4</sup> E( <sup>4</sup> G)    | 410             | 24390                      |
| <sup>4</sup> T <sub>2</sub> ( <sup>4</sup> G)                    | 426             | 23474                      |
| <sup>4</sup> T <sub>1</sub> ( <sup>4</sup> G)                    | 466             | 21459                      |

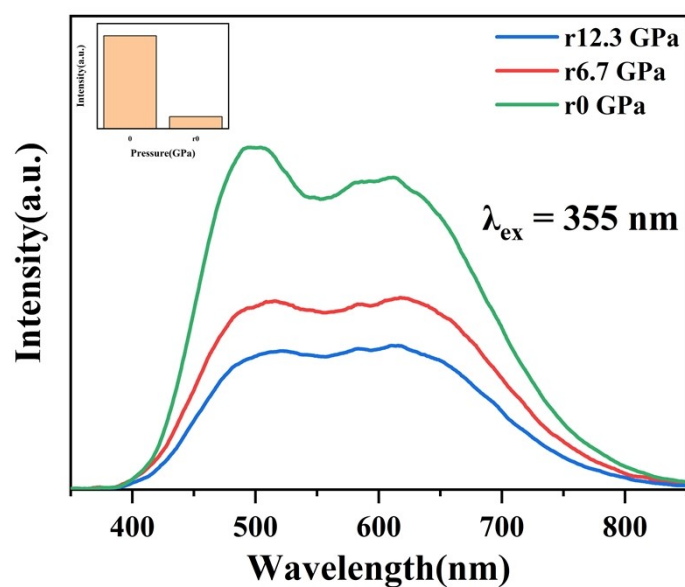

**Figure S8.** PL spectra of LMAS:0.01Eu<sup>2+</sup>,0.35Mn<sup>2+</sup> during the decompression process. The inset is the integral intensity after the decompression process compared with the initial integral intensity.
